# Supplementary material for: High-Dose Astaxanthin Supplementation Suppresses Antioxidant Enzyme Activity during Moderate-Intensity Swimming Training in Mice
Source: PubMed Central journal article supplement (PMC6627865; doi:10.3390/nu11061244), 2019-05-31
Supplement: nutrients-11-01244-s001.pdf [file nutrients-11-01244-s001.pdf]

## The composition of Mouse feed

### Macronutrients

| Ingredient    | Content |
|---------------|---------|
| Crude protein | ≥ 14%   |
| Crude fat     | ≥ 8%    |
| Crude fibre   | ≤ 9%    |
| Total         | 3400    |
| Clarories     | kcal/kg |

### Amino acids

| Ingredient | Content  |
|------------|----------|
| Arg;       | ≥ 0.90 % |
| Lys        | ≥ 0.85 % |
| Met        | ≥ 0.35 % |
| Cys        | ≥ 0.25 % |
| Trp        | ≥ 0.20 % |
| Gly        | ≥ 0.95 % |
| His        | ≥ 0.38 % |
| Leu        | ≥ 1.40 % |
| Ile        | ≥ 0.95 % |
| Phe        | ≥ 0.85 % |
| Tyr        | ≥ 0.60 % |
| Thr        | ≥ 0.65 % |
| Val        | ≥ 0.90 % |

### Vitamins

| Ingredient       | Content     |
|------------------|-------------|
| Vitamin A        | ≥ 1 IU/g    |
| Vitamin D        | ≥ 6.8 IU/g  |
| Vitamin E        | ≥ 83 ppm    |
| Vitamin K        | ≥ 1.0 ppm   |
| Thiamine         | ≥ 15 ppm    |
| Riboflavin       | ≥ 6.9 ppm   |
| Niacin           | ≥ 75 ppm    |
| Pantothenic acid | ≥ 27 ppm    |
| Choline          | ≥ 2950 ppm  |
| Pyridoxine       | ≥ 12 ppm    |
| Folic acid       | ≥ 1.9 ppm   |
| Biotin           | ≥ 0.28 ppm  |
| Cobalamin        | ≥ 0.048 ppm |

### Minerals

| Ingredient | Content   |
|------------|-----------|
| Ca         | ≥ 9.4%    |
| P          | ≥ 5.8 %   |
| K          | ≥ 0.68 %  |
| Na         | ≥ 0.18 %  |
| Mg         | ≥ 0.18 %  |
| Fe         | ≥ 160 ppm |
| Zn         | ≥ 48 ppm  |
| Mn         | ≥ 53 ppm  |
| Cu         | ≥ 5.8 ppm |
| I          | ≥ 0.6 ppm |
| Cr         | ≥ 1.2 ppm |
